# Supplementary material for: Fecal Microbial Structure and Metabolic Profile in Post-Weaning Diarrheic Piglets
Source: Genes (Basel). 2023 May 26;14(6):1166. doi: 10.3390/genes14061166 (PMC10298007; doi:10.3390/genes14061166)
Supplement: Supplementary file 1 [file genes-14-01166-s001.zip › Supplementary Figures.pdf]

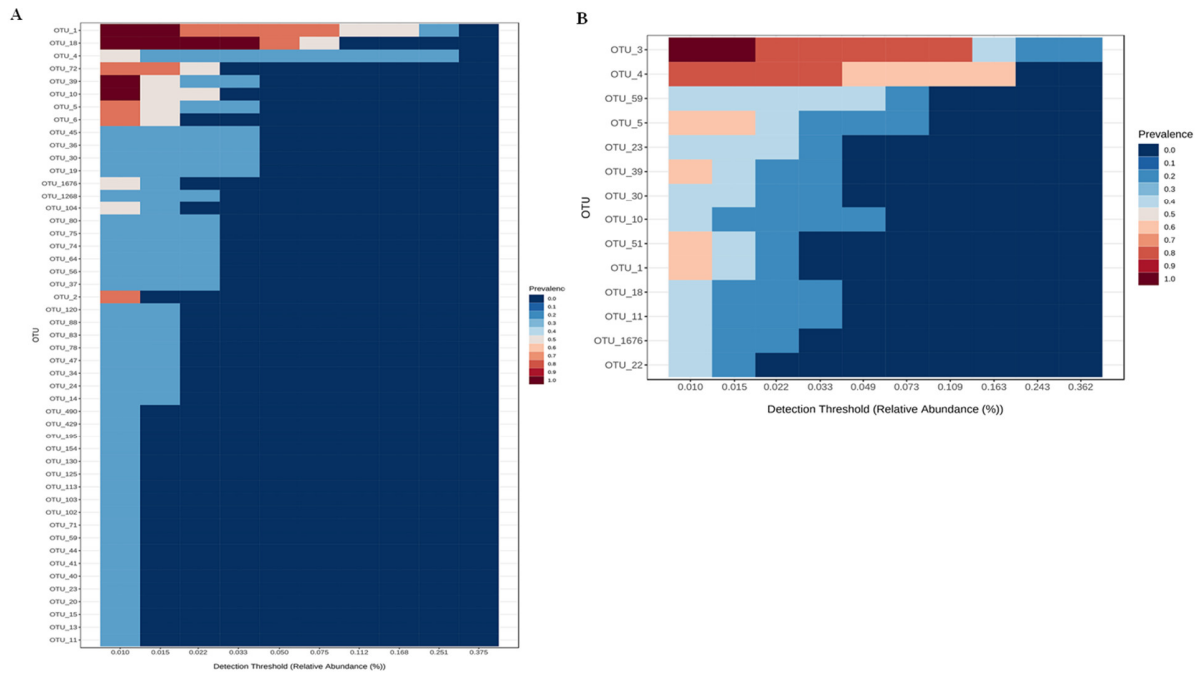

**Figure S1.** Core OTUs (with the relative abundance > 0.01% )in the feces of healthy (A) and diarrheic piglets (B).

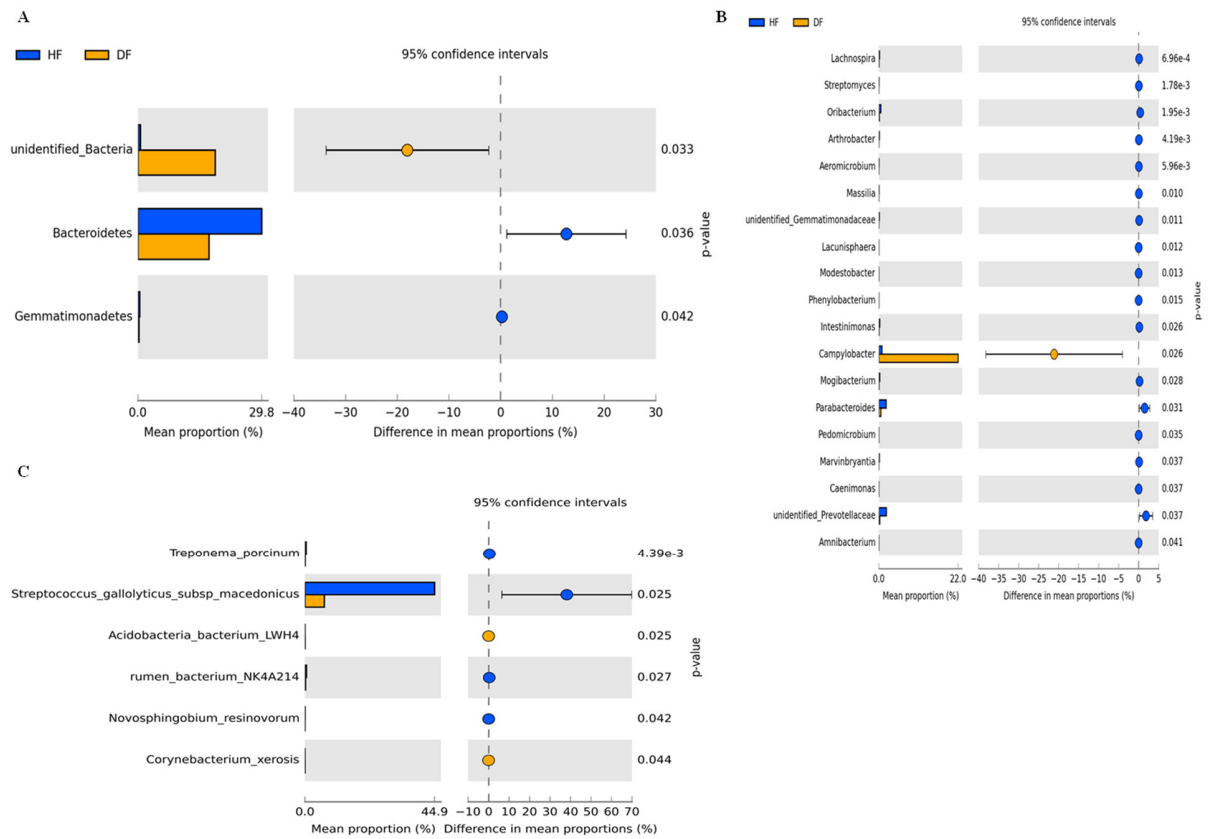

**Figure S2.** Differential microbiota between diarrheic and healthy piglets at the phylum (A), genus (B), and species (C) levels.

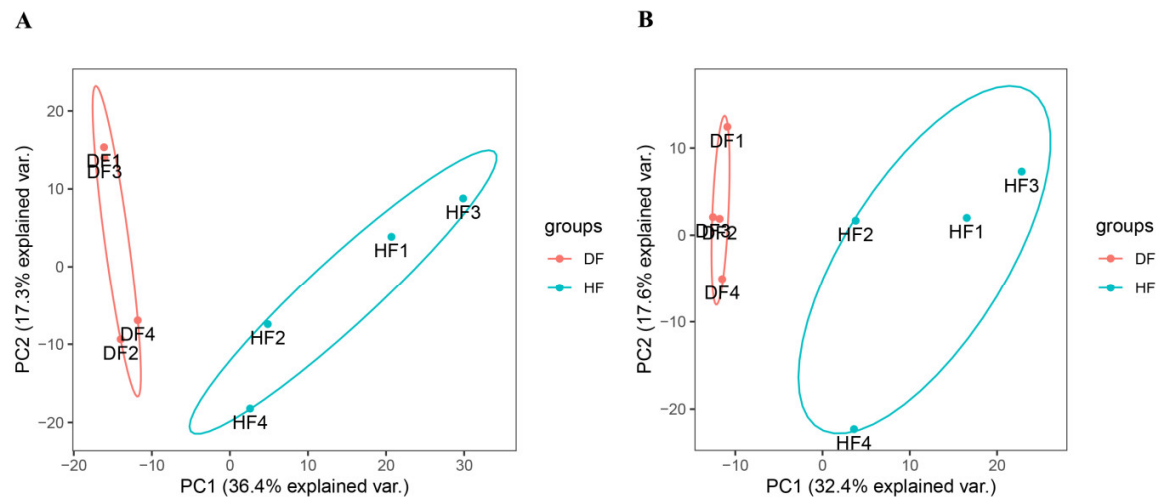

**Figure S3.** PCA analysis of total fecal samples in diarrheic and healthy piglets at positive (A) and negative (B) ions mode.

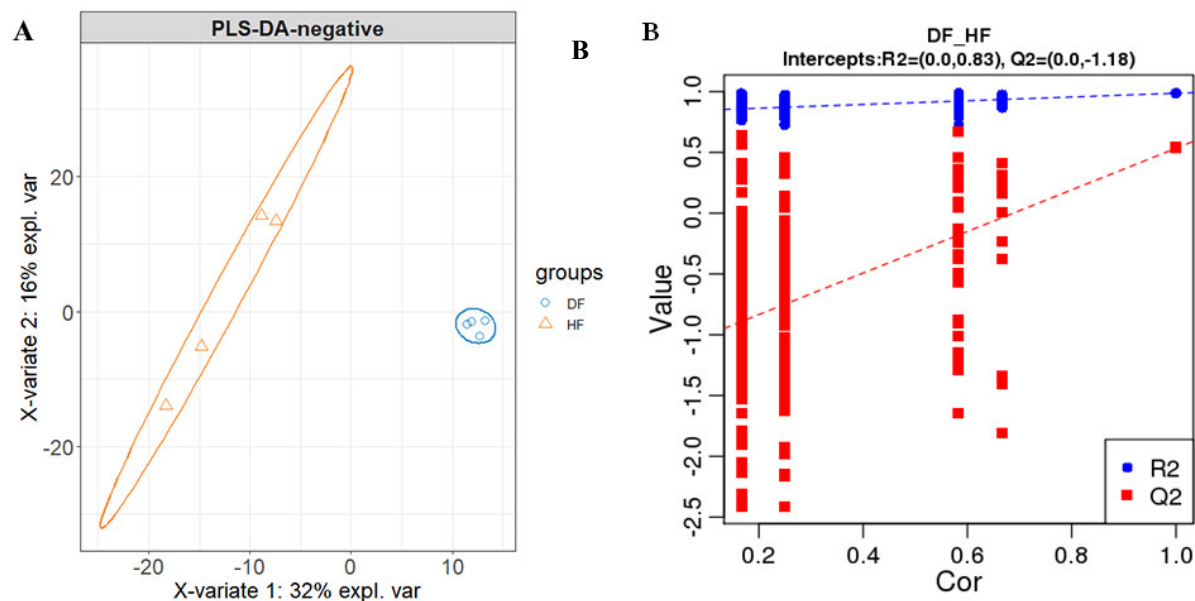

**Figure S4.** PLS-DA plot (A) and permutation test (B) derived from the fecal metabolite profiles of healthy and diarrheic piglets at negative ions mode.

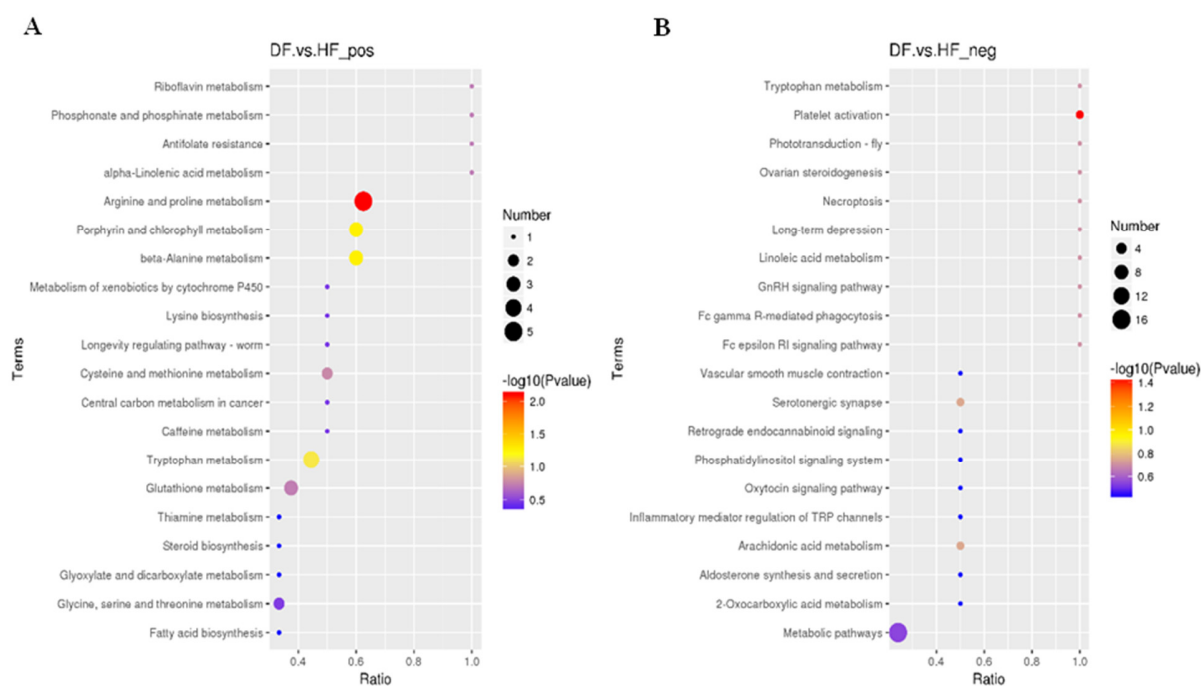

**Figure S5.** KEGG enrichment scatterplot of differential fecal metabolites at positive (A) and negative (B) ions mode.

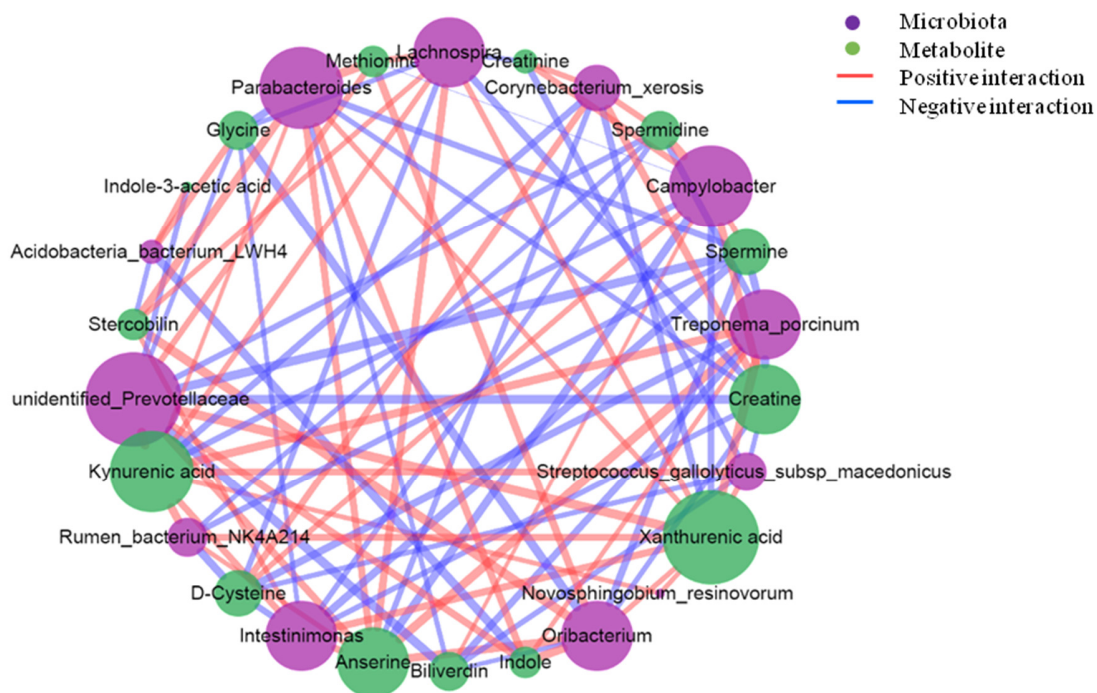

**Figure S6.** Correlation network of differential gut microbiota and fecal metabolites.
