# Supplementary material for: Fecal Microbial Structure and Metabolic Profile in Post-Weaning Diarrheic Piglets
Source: Genes (Basel). 2023 May 26;14(6):1166. doi: 10.3390/genes14061166 (PMC10298007; doi:10.3390/genes14061166)
Supplement: Supplementary file 1 [file genes-14-01166-s001.zip › Supplementary Table S1.pdf]

**Table S1.** Statistics of sample sequence number.

| Group | Sample name | Raw PE | Raw Tags | Clean Tags | Effective Tags | Avg Len (bp) | Q20   | Q30   | GC%   | Effective% |
|-------|-------------|--------|----------|------------|----------------|--------------|-------|-------|-------|------------|
| DF    | DF1         | 92,090 | 85,670   | 81,474     | 67,486         | 413          | 96.76 | 90.68 | 51.69 | 73.28      |
|       | DF2         | 94,464 | 87,573   | 82,174     | 60,053         | 413          | 96.55 | 90.37 | 52.26 | 63.57      |
|       | DF3         | 97,754 | 91,468   | 85,789     | 62,936         | 414          | 96.46 | 90.18 | 51.36 | 64.38      |
|       | DF4         | 90,172 | 85,551   | 81,867     | 67,602         | 407          | 96.89 | 91.03 | 53.88 | 74.97      |
| HF    | HF1         | 98,643 | 91,612   | 85,472     | 63,868         | 421          | 96.15 | 89.57 | 53.34 | 64.75      |
|       | HF2         | 98,205 | 91,494   | 86,062     | 66,674         | 414          | 96.6  | 90.51 | 52.72 | 67.89      |
|       | HF3         | 97,003 | 90,036   | 83,811     | 64,953         | 419          | 96.25 | 89.84 | 53.59 | 66.96      |
|       | HF4         | 97,999 | 89,863   | 84,002     | 65,677         | 418          | 96.41 | 90.14 | 53.47 | 67.02      |

Raw PE: raw data from pair-end sequencing; Raw tags: the spliced raw data; Clean tags: the sequences after quality control, including filtrations of poor-quality bases and NA (not available) data. Effective tags: clean tags after removing the chimeric sequences; Avg Len: average length of total sequences. Q20: PHRED quality score threshold of 20; Q30: PHRED quality score threshold of 30; GC%: Guanine-Cytosine content; Effective%: the percentage of effective tags to raw PE data.
