# Supplementary material for: Fecal Microbial Structure and Metabolic Profile in Post-Weaning Diarrheic Piglets
Source: Genes (Basel). 2023 May 26;14(6):1166. doi: 10.3390/genes14061166 (PMC10298007; doi:10.3390/genes14061166)
Supplement: Supplementary file 1 [file genes-14-01166-s001.zip › Supplementary Table S2.xlsx]

## Sheet: Sheet1
Table S2. Differential metabolites from fecal samples in diarrheic piglets.
Name	log2FC	P value	ROC	VIP	Up/Down
19(R)-HETE	-3.33	0	1	1.59	down
5-Hydroxytryptophol	-2.4	0	1	1.17	down
20-Carboxy-Leukotriene B4	-3.23	0	1	1.55	down
Xanthurenic acid	-3.72	0	1	1.84	down
2-(3,4-dihydroxyphenyl)acetamide	-2.71	0	1	1.37	down
1,8-Diazabicyclo [5.4.0]undec-7-ene	5.64	0	1	2.46	up
Sedanolide	-4.66	0	1	2.52	down
δ-Valerolactam	4.44	0	1	1.96	up
3,4-dihydroxy-4-(4-methoxyphenyl)-1,2,3,4-tetrahydroquinolin-2-one	-2.34	0	1	1.17	down
(-)-Caryophyllene oxide	-2.27	0	1	1.17	down
Oleanolic acid	-2.9	0	1	1.51	down
5α-Dihydrotestosterone	-4.69	0	1	2.25	down
N,N-Dimethylaniline	-3.93	0	1	2.16	down
Arachidonoyl amide	-3.08	0	1	1.49	down
α-Aspartylphenylalanine	-2.54	0	0.96	1.3	down
(R)-Equol	-5.28	0	1	2.77	down
Lovastatin	-1.96	0	1	1.01	down
2-Aminoacetophenone	-3.03	0	1	1.42	down
(6E,10E)-3,7,11,15-tetramethylhexadeca-1,6,10,14-tetraene-3,5,9-triol	3.2	0	1	1.51	up
Jasmone	-4.34	0	1	1.98	down
1-Methylguanine	4.43	0	1	2.09	up
3-methoxy-2-phenyl-4H-furo[2,3-h]chromen-4-one	-3.81	0	1	1.96	down
L-Saccharopine	-2.66	0	1	1.39	down
4-(pentyloxy)benzene-1-carbohydrazide	-3	0	1	1.47	down
6-cyclohex-3-enyl-5-nitropiperidin-2-one	-3.67	0	1	1.7	down
Prostaglandin E2-1-glyceryl ester	-4.37	0	1	2	down
α-Estradiol	-3.36	0	1	1.85	down
2-(4-methoxyphenyl)-4H-chromen-4-one	-3.43	0	1	1.56	down
2-(2-methoxyphenyl)-N-(2-quinolinyl)acetamide	-2.55	0	1	1.41	down
ACar 18:0	3.12	0	0.96	1.48	up
Jasmonic acid	-3	0	1	1.53	down
N~1~-(2,5-dimethoxyphenyl)-N~2~-(2-pyridin-2-ylethyl)ethanediamide	-2.67	0	1	1.2	down
2-[5-(2-hydroxypropyl)oxolan-2-yl]propanoic acid	-2.27	0	1	1.17	down
7-Methylguanine	3.35	0	0.96	1.63	up
Verrucarol	-2.41	0	1	1.29	down
Oleic acid	-5.31	0	1	2.4	down
Tyrosylalanine	-5.47	0	1	2.4	down
1,2-dihydroxyheptadec-16-yn-4-yl acetate	-3.02	0	0.96	1.86	down
1-[4-mercapto-2-(2-methoxyphenyl)-6-methylpyrimidin-5-yl]ethan-1-one	-4.09	0	1	1.84	down
Creatine	3.3	0	0.96	1.42	up
N-(2,3-dihydro-1,4-benzodioxin-6-yl)-2,5-dimethyl-3-furamide	-2.37	0	1	1.33	down
carbamazepine-d10	-2.96	0	1	1.35	down
Norbuprenorphine	2.51	0	0.96	1.15	up
N1-{4-methyl-2-[(3,4,5-trimethoxybenzylidene) amino] phenyl} acetamide	4.55	0	1	2.14	up
Deoxycholic Acid	-3.44	0	1	1.67	down
Kynurenic acid	-2.96	0	1	1.63	down
Asp-Phe methyl ester	-1.97	0	0.96	1.05	down
2-{2-oxo-2H,8H,9H-furo[2,3-h]chromen-8-yl}propan-2-yl acetate	4.25	0	0.96	2.25	up
Desoxycortone	4.25	0	1	1.71	up
N-(2-quinolinyl)-2,3-dihydro-1-benzofuran-6-carboxamide	-3.54	0	1	1.84	down
Pro-Leu	-1.83	0	0.96	1.04	down
N-Carbobenzoxy-β-alanine	-2.07	0	1	1.13	down
(1E,4Z,6E)-5-hydroxy-1,7-bis(4-hydroxyphenyl)hepta-1,4,6-trien-3-one	-5.58	0	1	2.4	down
FIBF-d7	-2.52	0	0.92	1.83	down
Ergosterol peroxide	-3.05	0	1	1.43	down
L-Tyrosinemethylester	-1.96	0.01	0.96	1.14	down
SM (d14:0/20:0)	2.38	0.01	1	1.17	up
1,1-Dimethyl-2-oxopropyl N-[2-(2-pyridyl)ethyl]carbamate	-4.05	0.01	1	1.78	down
(3β,5ξ,9ξ)-3,6,19-Trihydroxyurs-12-en-28-oic acid	-2.62	0.01	1	1.16	down
N-Desmethylclomipramine	-2.24	0.01	0.96	1.06	down
Limonin	-2.26	0.01	0.92	1.23	down
6??-Hydroxytestosterone	-2.09	0.01	1	1.26	down
Indole	-1.96	0.01	0.88	1.2	down
ethyl 4-amino-5-oxo-1-phenyl-2,5-dihydro-1H-pyrrole-3-carboxylate	-2.28	0.01	1	1.3	down
T-2 Triol	-2.76	0.01	1	1.33	down
Testosterone undecanoate	-2.55	0.01	1	1.54	down
16,16-Dimethyl prostaglandin A1	-2.02	0.01	0.88	1.43	down
Aflatoxin M1	-2.45	0.01	1	1.1	down
3-(4-nitrophenyl)[1,2,3]triazolo[1,5-a]quinazolin-5-amine	-6.12	0.01	1	2.63	down
Skatole	-4.38	0.01	1	3.23	down
ethyl 4-[2-(3,4,5-trimethoxybenzylidene)hydrazino]benzoate	2.08	0.01	0.92	1.07	up
Lysopc 20:0	2.99	0.01	1	1.62	up
PC (18:0/20:5)	2.71	0.01	1	1.05	up
Ergocalciferol	-3.31	0.01	1	1.52	down
Ursolic acid	-2.56	0.01	1	1.22	down
4-(4-methoxyphenyl)-6-pyridin-4-yl-1,3,5-triazin-2(3H)-one	-2.94	0.01	1	1.29	down
N2-phenyl-4-(piperidinomethyl)-1,3-thiazol-2-amine	-2.43	0.01	0.96	1.1	down
Medroxyprogesterone	-2.59	0.01	1	1.31	down
1-Caffeoylquinic Acid	3.04	0.01	0.88	1.42	up
methyl 2-[(2-acetyl-3-oxo-1-butenyl)amino]acetate	-2.34	0.01	1	1.04	down
Prolylleucine	4.24	0.01	0.88	1.63	up
ethyl 1-[2-(4-methoxyphenoxy)-5-nitrobenzoyl]-4-piperidinecarboxylate	2.53	0.01	0.96	1.19	up
5-Hydroxyindole	-2	0.01	1	1.15	down
Icaritin	-3.04	0.01	0.96	1.39	down
ethyl 3-(1,3-benzodioxol-5-ylamino)-2-cyanoacrylate	-2.9	0.01	0.96	1.44	down
2,2,5,5-tetramethyl-2,5-dihydro-1H-pyrrole-3-carboxamide	-4.41	0.01	1	1.92	down
LPE 14:0	2.29	0.01	0.96	1.09	up
3-(3,4-dimethoxyphenyl)-1-(2-hydroxy-4,6-dimethoxyphenyl)propan-1-one	-3.05	0.01	1	1.53	down
3-(1H-benzo[d]imidazol-2-yl)-6-ethyl-7-hydroxy-4H-chromen-4-one	-2.09	0.01	0.96	1.54	down
7-Methylxanthine	3.82	0.01	1	2.13	up
7-Ketocholesterol	-1.98	0.01	1	1.19	down
N1-Acetylspermine	6.85	0.01	0.96	2.32	up
Flavin mononucleotide (FMN)	3.01	0.01	0.92	1.38	up
1,3-bis(4-methoxybenzyl)-2-phenylhexahydropyrimidine	-4.16	0.01	0.96	1.87	down
1,3-Dihydro-1,3,3-trimethyl-2H-indol-2-ylidene acetaldehyde	-2.42	0.01	1	1.6	down
Saxitoxin	-4.45	0.01	1	1.96	down
ethyl 1-benzyl-3-oxopiperidine-4-carboxylate	-2.6	0.01	1	1.11	down
N'2-benzylidene-5-hex-1-ynylfuran-2-carbohydrazide	-4.01	0.01	1	1.7	down
Spermine	4.17	0.01	1	1.42	up
Dihydrothymine	5.48	0.01	0.96	1.96	up
4-(3,4-dimethoxyphenyl)-3-methyl-1H-pyrazol-5-amine	-2.44	0.01	1	1.09	down
Indole-3-acetic acid	3.95	0.01	0.88	1.48	up
(4E)-1,7-bis(3,4-dihydroxyphenyl)hept-4-en-3-one	-4.61	0.01	1	1.95	down
Methionine	-1.52	0.01	0.88	1.53	down
4-(4,5-dihydro-1H-imidazol-2-yl)-2,6-dimethylmorpholine hydrobromide	-4.65	0.01	0.96	2.08	down
(+-)-11-hydroxy-delta9-THC-d2	4.56	0.01	1	1.53	up
1-Phenyl-3-methyl-5-pyrazolone	-3.65	0.01	0.96	2	down
Palmitoylcarnitine	4.02	0.01	0.92	1.82	up
Puerarin	-2.42	0.01	1	1.55	down
Dextrorphan	-2.2	0.01	1	1.8	down
ethyl 2-(5-hydroxy-3-methyl-1-phenyl-1H-pyrazol-4-yl)acetate	-2.43	0.01	1	1.08	down
Biliverdin	2.56	0.01	0.96	1.28	up
Isoquinoline	3.86	0.02	0.88	1.43	up
4-(3-methoxy-5,6-dihydrobenzo[c]acridin-7-yl)morpholine	-4.47	0.02	0.96	2	down
4-butyl-4-(hydroxymethyl)-1,2-diphenylpyrazolidine-3,5-dione	-3.21	0.02	1	1.42	down
Monoolein	-2.2	0.02	0.92	1.39	down
1,4-dihydroxyheptadec-16-en-2-yl acetate	-1.88	0.02	0.88	1.21	down
4-styrylpyridine	-2.83	0.02	1	1.23	down
PC (15:0/15:1)	3.77	0.02	1	1.62	up
Reserpine	3.63	0.02	0.92	1.41	up
Guanidineacetic Acid	3.07	0.02	0.92	1.13	up
N-Desmethyltramadol	-5.02	0.02	1	2.16	down
Glycylproline	-2.02	0.02	1	1.02	down
D-α-Tocopherol	-2.21	0.02	1	1.62	down
N2-tetrahydrofuran-2-ylmethyl-4-(4-fluorophenyl)-1,3-thiazol-2-amine	-1.96	0.02	0.96	1.1	down
Ala-trp	-1.86	0.02	0.92	1.01	down
4-(3-methoxyphenyl)-4-methyl-2,6-dioxopiperidine-3,5-dicarbonitrile	-2.77	0.02	0.92	1.28	down
2-Aminooctanoic acid	-2.6	0.02	1	1.12	down
Quinoline	5.63	0.02	0.92	1.88	up
N-Caffeoyl Putrescine	-3.24	0.02	1	1.34	down
Anserine	-2.4	0.02	1	1.05	down
PC (18:5e/2:0)	-2.23	0.02	0.92	1.02	down
(5S)-5-hydroxy-1,7-diphenylheptan-3-one	-5.57	0.02	1	2.33	down
α-Linolenoyl ethanolamide	-4.6	0.02	1	1.87	down
2-(1,3-benzodioxol-5-yl)-5-(3-methoxybenzyl)-1,3,4-oxadiazole	-4.18	0.02	0.96	2.09	down
2-{[2-(1H-indol-3-yl)ethyl]ethanimidoyl}phenol	-7.18	0.02	1	2.69	down
Kahweol	-1.86	0.02	0.96	1.5	down
1-[2-(2,5-dimethyl-1H-pyrrol-1-yl)-4-nitrophenyl]-1H-imidazole	-3.78	0.02	1	1.54	down
Glycine	7.89	0.03	0.88	2.49	up
3-Acetoxyurs-12-en-23-oic acid	-1.87	0.03	0.96	1.49	down
Spermidine	3.91	0.03	1	2.19	up
Glycerol 1-hexadecanoate	-3.02	0.03	1	1.29	down
D-Cysteine	2.68	0.03	0.96	1.5	up
8-Hydroxyquinoline	-1.97	0.03	1	1.29	down
Monolaurin	-1.53	0.03	0.88	1.21	down
4-Hexyloxyaniline	-2.56	0.03	0.88	1.16	down
Pilocarpine	-3.92	0.03	0.92	1.77	down
Prostaglandin B1	-5.25	0.03	1	2.03	down
1-adamantyl(1,4-thiazinan-4-yl)methanone	-5.33	0.03	1	2.09	down
3-Hydroxylidocaine	-3.16	0.03	0.92	1.95	down
Creatinine	2.31	0.03	0.92	1.41	up
3-(3,4,5-trimethoxyphenyl)propanoic acid	-3.41	0.03	1	1.36	down
Riboflavin	2.69	0.03	0.88	1.28	up
2-(3,4-dihydroxyphenyl)-7-hydroxy-3,4-dihydro-2H-1-benzopyran-4-one	-3.05	0.03	0.96	1.38	down
PC (14:0e/18:1)	2.49	0.03	0.92	1.02	up
3-Methoxy prostaglandin F1α	-1.54	0.03	0.88	1.2	down
7-(2-aminophenyl)heptanoic acid	-4.79	0.03	0.96	1.98	down
4-(4-methoxyphenyl)-4,5-dihydropyrrolo[1,2-a]quinoxaline	-1.69	0.03	0.88	1.87	down
Midazolam-d4	-4.76	0.03	0.96	1.9	down
Nicotinuric acid	5.32	0.03	0.83	1.75	up
8Z,11Z,14Z-Eicosatrienoic acid	2.28	0.03	0.96	1.21	up
Kanosamine	3.05	0.04	0.88	1.33	up
Stercobilin	-1.81	0.04	0.83	2.14	down
7-hydroxy-6-nitro-2,3-dihydro-1H,5H-pyrido[3,2,1-ij]quinolin-5-one	-3.72	0.04	0.96	1.55	down
3-(propan-2-yl)-octahydropyrrolo[1,2-a]pyrazine-1,4-dione	-4.01	0.04	1	1.54	down
4-Hydroxymandelonitrile	-3.38	0.04	0.96	1.37	down
Phenylethanolamine	-1.64	0.04	0.88	1.26	down
L-Alanyl-L-proline	-1.59	0.04	0.88	1.23	down
Lysopg 18:1	-1.92	0.04	0.92	1.31	down
Phenylacetylglycine	7.99	0.04	0.79	2.46	up
N'1-(3,4,5-trimethoxybenzylidene)-3-(4-hydroxyphenyl)propanohydrazide	-2.51	0.04	0.88	1.15	down
Oxytetracycline	-1.24	0.04	0.83	1.04	down
4-Guanidinobutyric acid	-3.62	0.04	0.88	1.48	down
Deoxycorticosterone 21-glucoside	-2.95	0.04	0.83	1.48	down
9-Oxo-10(E),12(E)-octadecadienoic acid	-3.37	0.04	1	1.34	down
16-Heptadecyne-1,2,4-triol	-5.1	0.05	0.96	1.9	down
Isobutyryl carnitine	-3.93	0.05	1	1.46	down
N-Oleoyl dopamine	2.28	0.05	0.88	1.42	up
α-Hydroxyhippuric acid	4.66	0.05	0.79	1.51	up
allantoate	4.43	0.05	0.83	1.48	up
7-Methylguanosine	2.21	0.05	0.92	1.12	up
ACar 19:3	3.14	0.05	0.92	1.12	up
benzyl (cyclohexylamino)methanethioate	-2.85	0.05	0.92	1.22	down
Methanandamide	-3.64	0.05	1	1.38	down
Ecgonine	-2.99	0.05	0.92	1.28	down
Carnitine	-3.97148	1.58e-05	1	1.89969	down
FAHFA (22:5/18:1)	3.50309	4.99e-05	1	1.66326	up
4-Pyridoxic acid	-3.40634	6.78e-05	1	1.61145	down
PAF C-16	-5.0119	0.000137	1	2.3663	down
lipoamide	-2.84341	0.000143	1	1.39317	down
Gibberellin A4	-3.17977	0.000321	1	1.53761	down
FAHFA (20:3/22:5)	4.77741	0.000469	1	2.3159	up
N-Acetyl-L-Glutamic Acid	-4.00416	0.000515	1	1.8801	down
4-phenyl-2-[(3-pyridylamino)methylidene]cyclohexane-1,3-dione	-2.98666	0.000606	1	1.49276	down
Aflatoxin G1	-4.08847	0.000614	1	1.99501	down
3-(methylsulfanyl)-5H-[1,2,4]triazino[5,6-b]indole	-5.9522	0.000617	1	2.69668	down
D-Alanyl-D-alanine	-2.80349	0.000645	1	1.43465	down
18-β-Glycyrrhetinic acid	-4.14979	0.000698	1	2.15898	down
N-Acetyl-DL-norvaline	-2.28778	0.000713	1	1.0405	down
Equol	-6.33188	0.000735	1	3.10556	down
FAHFA (22:5/20:3)	3.31816	0.000872	1	1.42913	up
Arachidonic acid	3.20442	0.001135	1	1.36071	up
(2α,3β,19α)-2,3,19-Trihydroxyolean-12-en-28-oic acid	-4.05536	0.001158	1	2.29106	down
(3β,5ξ,9ξ)-3,23-Dihydroxy-1-oxoolean-12-en-28-oic acid	-5.04846	0.001187	1	2.30622	down
5-chloro-N-(4-morpholinophenyl)-1H-indole-2-carboxamide	-3.98362	0.001222	1	1.84406	down
Glycyl-L-Proline	-2.23417	0.001776	1	1.13089	down
2-Hydroxyphenylacetic acid	-2.62306	0.001906	1	1.22032	down
FAHFA (20:4/22:5)	3.51391	0.001965	0.958333	1.5485	up
12-Hydroxydodecanoic acid	-2.35682	0.00208	1	1.1328	down
N-(1-Carboxymethyl)-L-lysine	-2.05286	0.002131	0.958333	1.06062	down
Shikimic acid	-3.43222	0.002187	1	1.50533	down
Phenobarbital-d5	-3.94568	0.002306	1	1.69823	down
PB-22 N-pentanoic acid-3-carboxyindole metabolite	-3.4367	0.002604	1	1.49299	down
methyl 5-{[2-(ethoxycarbonyl)-3-oxohex-1-enyl]amino}-2-furoate	-3.92113	0.002909	0.958333	1.86491	down
Isorhapontigenin	-6.91623	0.00293	1	2.98675	down
Deoxyadenosine	-2.78947	0.003005	1	1.22272	down
4-Hydroxyretinoic Acid	-2.9229	0.003201	1	1.2792	down
Luteolin	-2.84873	0.00329	0.958333	1.63389	down
Methyl-beta-galactopyranoside	-2.98188	0.003438	1	1.45696	down
N-Phenylacetylglycine	-3.26808	0.003574	1	1.42181	down
FAHFA (18:2/20:3)	2.38531	0.003584	0.958333	1.06028	up
FAHFA (22:5/22:3)	3.53059	0.003698	1	1.64372	up
Indole-2-carboxylic acid	-3.86351	0.004029	1	2.06627	down
Honokiol	-5.17354	0.004548	1	2.3583	down
Saccharin	-3.03522	0.004758	1	1.51143	down
4-(octyloxy)benzoic acid	-3.33296	0.00504	1	1.48152	down
Piceatannol	-3.43174	0.005587	0.958333	1.69224	down
3-(2-Hydroxyethyl)indole	-2.32919	0.005827	0.958333	1.40908	down
Enterodiol	-5.7741	0.005828	1	2.39927	down
Docosapentaenoic acid	3.30507	0.005953	1	1.58739	up
N1-[4-(cyanomethyl)phenyl]-4-chlorobenzamide	-2.70149	0.00709	1	1.1835	down
Hydrocinnamic acid	-3.25462	0.007216	1	2.35459	down
FAHFA (20:3/18:2)	3.32385	0.00772	1	1.69091	up
FAHFA (16:1/18:3)	2.45784	0.008043	1	1.27	up
L-Histidine	-3.65556	0.008217	1	1.52893	down
FAHFA (3:0/24:2)	-2.9244	0.008351	0.958333	1.40872	down
7-Ketodeoxycholic acid	-2.33303	0.008501	0.958333	1.17154	down
16α-Hydroxyestrone	-4.84725	0.008788	1	2.00796	down
Adipic acid	-4.18237	0.008859	1	1.73302	down
4-[2-(2-oxo-1-imidazolidinyl)ethyl]-1lambda~6~,4-thiazinane-1,1-dione	-2.58989	0.008931	0.958333	1.38203	down
Ascorbyl stearate	-3.39986	0.009211	1	1.45943	down
5-Hydroxyindole-2-carboxylic acid	-2.47193	0.009655	1	1.04595	down
Protoporphyrin IX	3.76422	0.010234	0.916667	1.77271	up
6-Hydroxycaproic acid	-2.45106	0.010282	1	1.03822	down
3-Indoxyl sulphate	9.62787	0.010422	0.875	3.29312	up
Orotic Acid	-1.75988	0.010854	0.875	1.22982	down
3-methyl-5-oxo-5-(4-toluidino)pentanoic acid	-1.6005	0.011285	0.916667	1.0407	down
4-(anilinomethylidene)-3-methyl-4,5-dihydroisoxazol-5-one	-3.92318	0.011551	1	1.69065	down
Gly-Tyr	-6.37164	0.011592	1	2.52321	down
FAHFA (22:4/20:2)	3.0457	0.012048	0.958333	1.31212	up
1-methyl-N-(4-piperidinophenyl)-1H-imidazole-4-sulfonamide	-3.65801	0.012434	1	1.48496	down
13-Hpotre(R)	-3.07787	0.012861	1	1.3229	down
PG (18:1/18:2)	3.6229	0.01307	0.916667	1.51907	up
Quercetin-3β-D-glucoside	-3.42182	0.013119	0.958333	1.54609	down
5-heptyl-4-hydroxy-6H-pyrido[3,2,1-jk]carbazol-6-one	-1.66596	0.013122	0.916667	1.02795	down
N1-[4-(2-thienylthio)phenyl]-4-chlorobenzamide	-5.3356	0.013279	0.958333	2.60265	down
4-Hydroxybenzophenone	-3.27523	0.013314	1	1.46486	down
Lipoic acid	2.79055	0.015196	0.958333	1.08672	up
FAHFA (22:4/20:3)	2.8903	0.01532	0.958333	1.398	up
N-(2,6-Dimethylphenyl)-N-(methoxyacetyl) alanine	-1.33677	0.015348	0.833333	1.39422	down
13,14-Dihydro-15-keto Prostaglandin A2	-4.13557	0.015764	0.958333	1.917	down
2,4-Dihydroxybenzoic acid	-2.26221	0.016168	0.958333	1.12912	down
20-Hydroxy-(5Z,8Z,11Z,14Z)-eicosatetraenoic acid	-2.09169	0.017189	0.916667	1.10128	down
Cytidine-5'-monophosphate	2.51293	0.017378	0.916667	1.18841	up
1-Methylguanidine	-2.90859	0.017849	0.958333	1.21854	down
L-Glutathione oxidized	2.21218	0.017929	1	1.05754	up
Citric acid	2.84198	0.018421	0.916667	1.26769	up
1-(2,4-dihydroxyphenyl)-2-(3,5-dimethoxyphenyl)propan-1-one	-6.72364	0.019351	1	2.59351	down
5-Hydroxyindole-3-acetic acid	-2.41983	0.019663	1	1.53279	down
D-myo-Inositol 1,4-bisphosphate	4.25895	0.019901	0.916667	1.60942	up
5,6-Dihydroxyindole-2-Carboxylic Acid	-2.90846	0.01998	0.958333	1.21516	down
DL-3,4-Dihydroxyphenyl glycol	-2.95717	0.020086	1	1.17308	down
6-Keto-prostaglandin f1alpha	-2.85793	0.021155	0.916667	1.28257	down
Pentadecanoic acid	-3.4288	0.021261	0.958333	1.42856	down
Prostaglandin F1α	-1.89619	0.023229	0.916667	1.05147	down
FAHFA (2:0/24:4)	-2.99434	0.023438	1	1.32993	down
Kaempferitrin	3.03995	0.023474	0.916667	1.30765	up
4-Methylcatechol	-5.91202	0.023571	1	2.06931	down
FAHFA (5:0/24:4)	-4.58048	0.023721	1	1.83469	down
N'-(cyclohexylcarbonyl)-4-methyl-1,2,3-thiadiazole-5-carbohydrazide	-3.59027	0.024274	1	1.42997	down
FAHFA (16:0/20:2)	3.29629	0.024512	1	1.92794	up
Gly-Phe	-4.09212	0.025535	1	1.62283	down
FAHFA (20:4/22:3)	2.20051	0.025713	0.958333	1.15119	up
PE (18:1/18:1)	3.07175	0.025954	0.875	1.42428	up
L-Threonic acid	3.16044	0.026271	0.916667	1.42447	up
Glucuronic acid-3,6-lactone	-2.55145	0.026634	0.875	1.33213	down
Prostaglandin A1 ethyl ester	-3.22444	0.028375	0.958333	1.30676	down
6-Hydroxymelatonin	4.72971	0.028395	0.75	1.69227	up
6α-Prostaglandin I1	-2.75874	0.028681	0.875	1.25485	down
PG (18:2/18:2)	3.63634	0.029214	0.875	1.41234	up
delta9-THC-d9	-3.48559	0.030442	0.958333	1.68227	down
Hydrocortisone 21-acetate	3.13727	0.030716	0.875	1.0551	up
4-Hydroxy-L-Glutamic Acid	-4.68373	0.032369	1	1.68434	down
3,8,9-trihydroxy-10-propyl-3,4,5,8,9,10-hexahydro-2H-oxecin-2-one	-2.09919	0.032805	0.875	1.27838	down
1,3-dipyridin-3-ylpropane-1,3-dione	-4.68874	0.032821	1	1.77293	down
Deoxycholic acid	-1.79307	0.033451	0.916667	1.22348	down
11(Z),14(Z)-Eicosadienoic acid	2.5936	0.034837	0.875	1.23993	up
8-Iso-15-keto-prostaglandin-F2β	-1.42617	0.036025	0.875	1.08095	down
FAHFA (18:1/18:2)	2.29944	0.037074	0.875	1.24168	up
1-benzyl-3-(2-methylphenyl)-3,7-dihydro-1H-purine-2,6-dione	-6.53846	0.037183	1	2.30899	down
2-(1H-1,2,3-benzotriazol-1-yl)-N-(2,3-dihydro-1H-inden-2-yl)acetamide	-2.77503	0.039344	0.916667	1.2967	down
Phloretin	-5.06577	0.039892	1	1.91751	down
5-(tert-butyl)-2-methyl-N-(5-methyl-3-isoxazolyl)-3-furamide	-3.18622	0.041232	1	1.20115	down
Azelaic acid	-4.02969	0.042298	1	1.43902	down
Capryloylglycine	-1.80124	0.042493	0.833333	1.03239	down
Prostaglandin G2	-3.09421	0.045196	0.958333	1.20362	down
3,3-Dimethylglutaric acid	-2.70388	0.045381	1	1.03653	down
Trigoneoside Xb	-3.25855	0.045833	1	1.18677	down
Phosphopyruvic acid	2.25818	0.046277	0.875	1.01413	up
FAHFA (16:0/18:0)	2.50996	0.046399	0.916667	1.62671	up
Mycophenolic acid	-4.71737	0.047022	1	1.67748	down
FAHFA (3:0/24:4)	-3.1202	0.048454	1	1.26489	down
Log2FC: log translation of the ratio of metabolite abundances between diarrheic and healthy piglets; VIP: variable importance in the projection; up/down: up-regulated or down-regulated expression of differential metabolites in diarrheic piglets.
